# Supplementary material for: Synthesis of titanium-oxo macrocyles and their catalytic properties for oxidative desulfurization
Source: Royal Society of Chemistry journal article supplement (doi:10.1039/c9dt03057c), 2019-01-01
Supplement: c9dt03057c1.pdf [file c9dt03057c1.pdf]

## Electronic Supplementary Information

### Synthesis of titanium-oxo macrocycles and catalytic property for oxidative desulfurization

Hai-Ting Lv, Ying Cui, Guo-Dong Zou,\* Na Li, Pei Yang and Yang Fan\*

College of Chemistry and Chemical Engineering, Xinyang Normal University, Xinyang 464000, China

#### Contents

**Table S1.** Crystal data and structure refinements summary for  $Ti_{32}$ -BTA and  $Ti_{32}$ -DMBTA.

**Fig. S1** XRD patterns of (a)  $Ti_{32}$ -BTA and (b)  $Ti_{32}$ -DMBTA.

**Fig. S2** FT-IR spectra of  $Ti_{32}$ -BTA and  $Ti_{32}$ -DMBTA.

**Fig. S3** SEM image of (a)  $Ti_{32}$ -BTA and (b)  $Ti_{32}$ -DMBTA.

**Fig. S4** Desulfurization efficiencies for BT and 4,6-DMDBT with  $Ti_{32}$ -BTA as catalyst.

**Fig. S5** Recycle tests in the oxidation of DBT with  $Ti_{32}$ -BTA as catalyst.

**Fig. S6** XRD patterns of  $Ti_{32}$ -BTA before and after ODS reaction.

**Fig. S7** Ti 2p XPS spectra of  $Ti_{32}$ -BTA before and after treated with  $H_2O_2$ .

**Fig. S8** Diffuse reflectance spectra of  $Ti_{32}$ -DMBTA before and after treated with  $H_2O_2$ .

**Table S1.** Crystal data and structure refinements summary for **Ti<sub>32</sub>-BTA** and **Ti<sub>32</sub>-DMBTA**.

|                                                                    | <b>Ti<sub>32</sub>-BTA</b>                                          | <b>Ti<sub>32</sub>-DMBTA</b>                                        |
|--------------------------------------------------------------------|---------------------------------------------------------------------|---------------------------------------------------------------------|
| Empirical formula                                                  | C <sub>160</sub> H <sub>408</sub> O <sub>188</sub> Ti <sub>32</sub> | C <sub>204</sub> H <sub>456</sub> O <sub>172</sub> Ti <sub>32</sub> |
| Formula weight                                                     | 6873.64                                                             | 7194.46                                                             |
| Crystal system                                                     | tetragonal                                                          | monoclinic                                                          |
| Space group                                                        | <i>P4/n</i>                                                         | <i>C2/c</i>                                                         |
| <i>a</i> (Å)                                                       | 33.635(3)                                                           | 51.758(4)                                                           |
| <i>b</i> (Å)                                                       | 33.635(3)                                                           | 14.9948(11)                                                         |
| <i>c</i> (Å)                                                       | 13.0634(12)                                                         | 47.346(3)                                                           |
| <i>α</i> (°)                                                       | 90                                                                  | 90                                                                  |
| <i>β</i> (°)                                                       | 90                                                                  | 119.823(2)                                                          |
| <i>γ</i> (°)                                                       | 90                                                                  | 90                                                                  |
| <i>V</i> (Å <sup>3</sup> )                                         | 14779(3)                                                            | 31879(4)                                                            |
| <i>Z</i>                                                           | 2                                                                   | 4                                                                   |
| $\rho_{\text{calcd}}$ (g cm <sup>-3</sup> )                        | 1.545                                                               | 1.499                                                               |
| $\mu$ (mm <sup>-1</sup> )                                          | 0.916                                                               | 0.850                                                               |
| <i>F</i> (000)                                                     | 7152                                                                | 15040                                                               |
| <i>T</i> (K)                                                       | 100(2)                                                              | 100(2)                                                              |
| Measured refls.                                                    | 84405                                                               | 150653                                                              |
| Independent refls.                                                 | 12977                                                               | 31311                                                               |
| <i>R</i> <sub>int</sub>                                            | 0.0717                                                              | 0.0851                                                              |
| GOF                                                                | 1.156                                                               | 1.036                                                               |
| <i>R</i> <sub>1</sub> [ <i>I</i> > 2σ( <i>I</i> )] <sup>[a]</sup>  | 0.1297                                                              | 0.1064                                                              |
| <i>wR</i> <sub>2</sub> [ <i>I</i> > 2σ( <i>I</i> )] <sup>[b]</sup> | 0.3005                                                              | 0.2837                                                              |

$${}^a R_1 = \sum \|F_o\| - \|F_c\| / \sum \|F_o\|, \quad {}^b wR_2 = [\sum w(F_o^2 - F_c^2)^2 / \sum w(F_o^2)^2]^{1/2}.$$

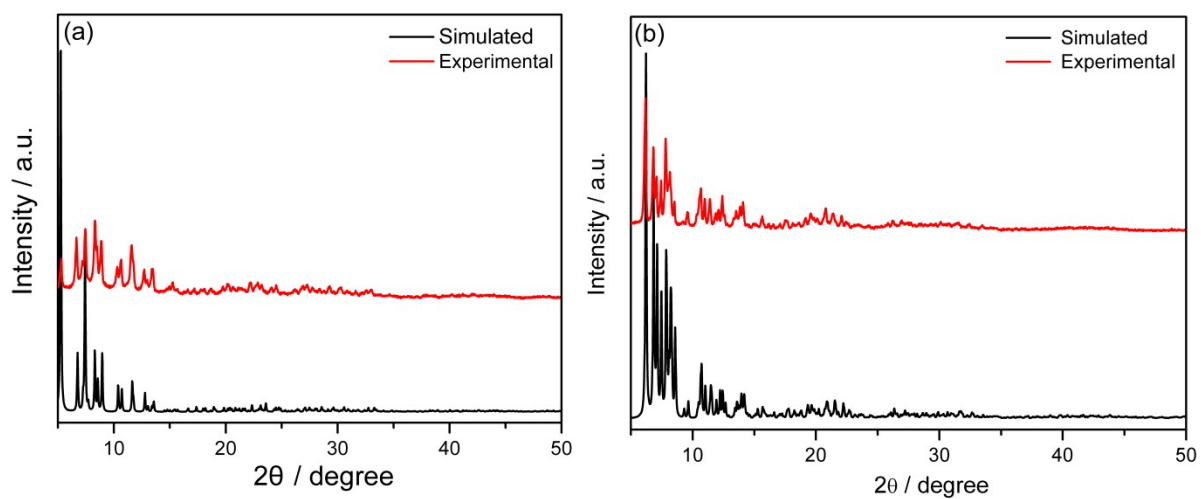

**Fig. S1** XRD patterns of (a)  $Ti_{32}$ -BTA and (b)  $Ti_{32}$ -DMBTA.

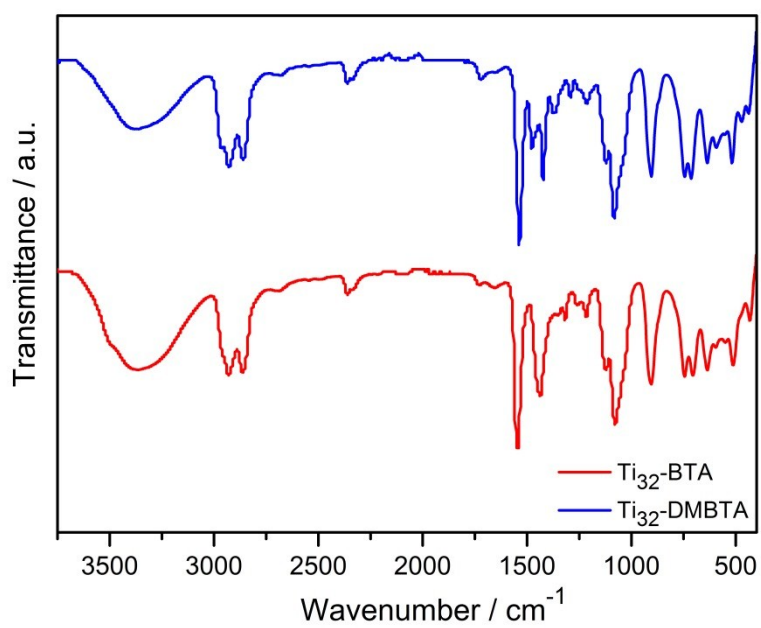

**Fig. S2** FT-IR spectra of  $Ti_{32}$ -BTA and  $Ti_{32}$ -DMBTA.

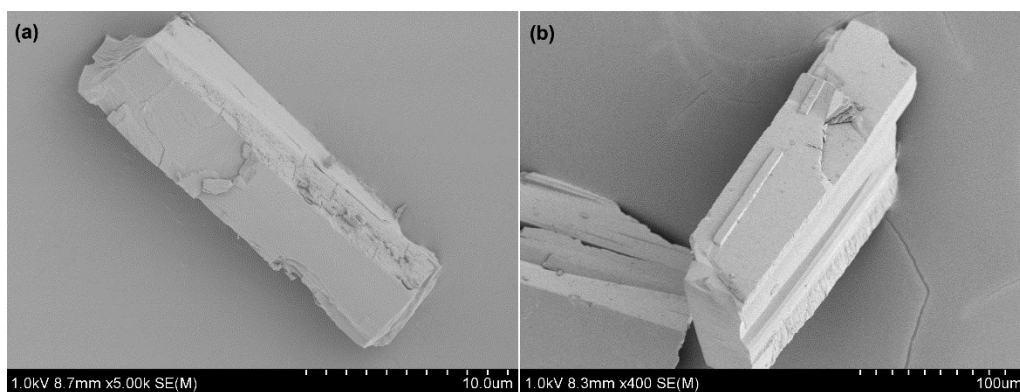

**Fig. S3** SEM image of (a)  $Ti_{32}$ -BTA and (b)  $Ti_{32}$ -DMBTA.

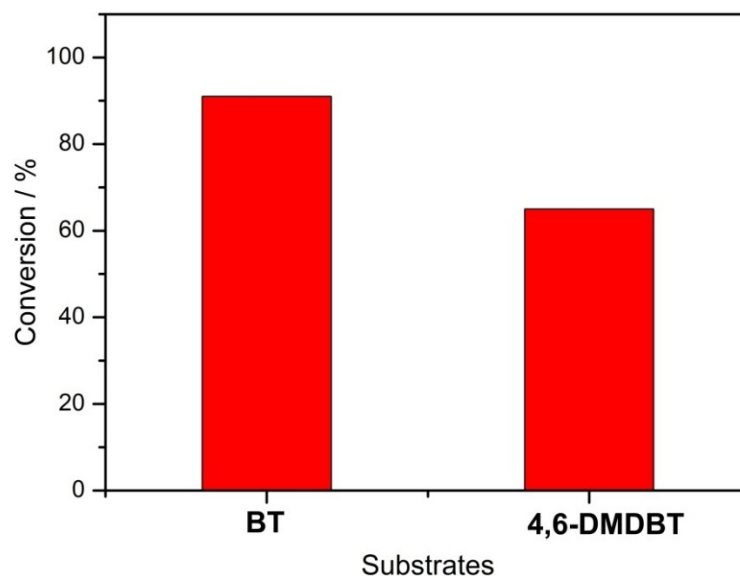

**Fig. S4** Desulfurization efficiencies for BT and 4,6-DMDBT with  $Ti_{32}$ -BTA as catalyst.

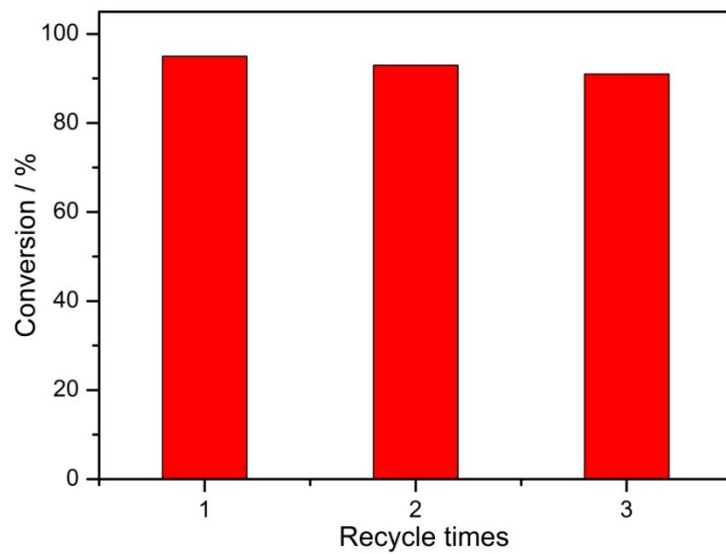

**Fig. S5** Recycle tests in the oxidation of DBT with  $Ti_{32}$ -BTA as catalyst.

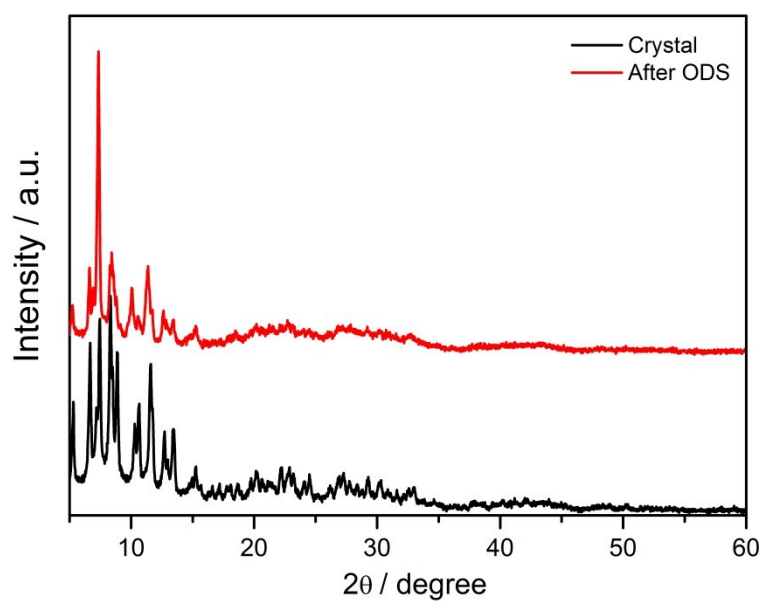

**Fig. S6** XRD patterns of  $Ti_{32}$ -BTA before and after ODS reaction.

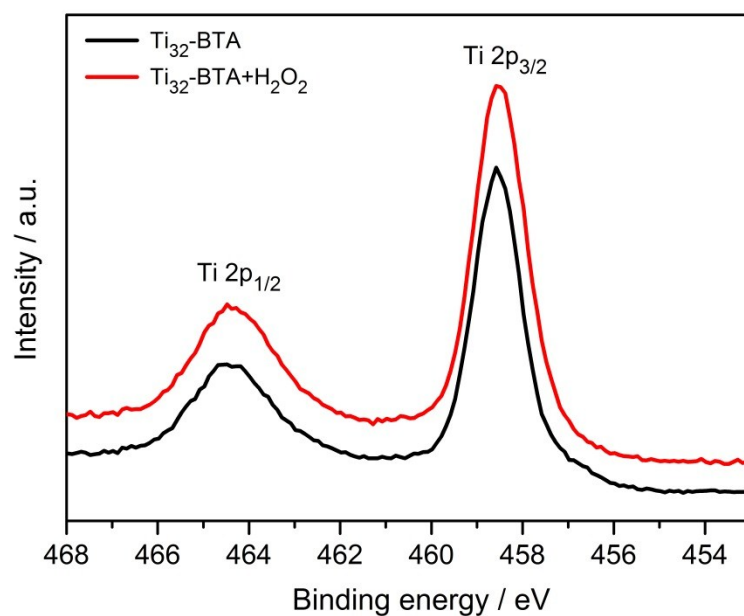

**Fig. S7** Ti 2p XPS spectra of Ti<sub>32</sub>-BTA before and after treated with H<sub>2</sub>O<sub>2</sub>.

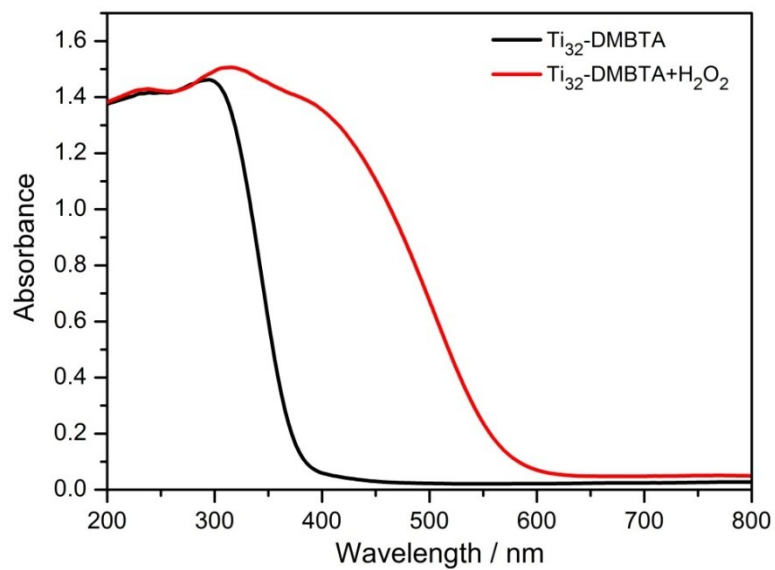

**Fig. S8** Diffuse reflectance spectra of Ti<sub>32</sub>-DMBTA before and after treated with H<sub>2</sub>O<sub>2</sub>.
